# Supplementary material for: A variable DNA recognition site organization establishes the LiaR-mediated cell envelope stress response of enterococci to daptomycin
Source: PubMed Central journal article supplement — Nucleic Acids Res. 2015 Apr 19;43(9):4758–73. doi: 10.1093/nar/gkv321 (PMC4482077; doi:10.1093/nar/gkv321), 2015-04-19

1 **Supplemental Information.**

2  
3 **A variable DNA recognition site organization establishes the LiaR mediated cell**  
4 **envelope stress response of enterococci to daptomycin.**

5  
6 **Authors: Milya Davlieva, Yiwen Shi, Paul G. Leonard, Troy A. Johnson, Michael R.**  
7 **Zianni, Cesar A. Arias, John E. Ladbury and Yousif Shamoo.**

8  
9 **Table S1. Data collection and refinement statistics**

10

| Data set                                      | LiaR <sup>DBD</sup>                  | LiaR <sup>(DBD)D191N</sup>           | LiaR <sup>DBD</sup><br>/consensus <i>liaXYZ</i> | LiaR <sup>(DBD)D191N</sup><br>/consensus <i>liaXYZ</i> | LiaR <sup>(DBD)D191N</sup><br>/secondary <i>liaXYZ</i> |
|-----------------------------------------------|--------------------------------------|--------------------------------------|-------------------------------------------------|--------------------------------------------------------|--------------------------------------------------------|
| <b>Data collection</b>                        |                                      |                                      |                                                 |                                                        |                                                        |
| Wavelength (Å)                                | 0.97872                              | 0.97856                              | 0.9788                                          | 0.9788                                                 | 0.9788                                                 |
| Resolution (Å) <sup>a</sup>                   | 30.0-1.78<br>(1.81-1.78)             | 30.0-1.48 (1.51-<br>1.48)            | 30.0-2.3<br>(2.34-2.28)                         | 30.0-2.3<br>(2.34-2.30)                                | 30.0-2.5<br>(2.54-2.5)                                 |
| Space group                                   | P2 <sub>2</sub> 1 <sub>2</sub> 1     | P2 <sub>2</sub> 1 <sub>2</sub> 1     | P2 <sub>1</sub> 2 <sub>1</sub> 2 <sub>1</sub>   | P2 <sub>1</sub> 2 <sub>1</sub> 2 <sub>1</sub>          | P6 <sub>2</sub>                                        |
| Cell dimensions<br>a,b,c; (Å)<br>α, β, γ; (°) | 31.23, 77.02,<br>77.19<br>90, 90, 90 | 31.05, 76.93,<br>76.92<br>90, 90, 90 | 38.3, 77.9, 104.7<br>90, 90, 90                 | 33.34, 77.25,<br>104.99<br>90, 90, 90                  | 113.45, 113.45<br>48.11<br>90, 90, 120                 |
| Molecules per<br>a.u.                         | 2                                    | 2                                    | 2                                               | 2                                                      | 2                                                      |
| Reflections<br>Total<br>Unique <sup>a</sup>   | 208834<br>18096                      | 420527<br>30660                      | 206189<br>14672                                 | 197972<br>14428                                        | 280738<br>12455                                        |
| Average<br>redundancy <sup>a</sup>            | 11.5 (11.5)                          | 13.7 (9.7)                           | 14.1 (14.8)                                     | 13.7 (11.7)                                            | 22.5 (22.3)                                            |
| Completeness<br>(%) <sup>a</sup>              | 97.7 (96.3)                          | 96.9 (92.6)                          | 100 (100)                                       | 99.9 (99.2)                                            | 100 (100)                                              |
| R <sub>merge</sub> (%) <sup>a,b</sup>         | 7.3 (34.3)                           | 6.5 (66.9)                           | 10.7 (43.1)                                     | 9.7 (90.4)                                             | 10 (73.1)                                              |
| Output <I/sigI> <sup>a</sup>                  | 31.64 (7.5)                          | 34.8 (1.88)                          | 25.0 (7.2)                                      | 26 (2.66)                                              | 33.7 (9.7)                                             |
| <b>Refinement</b>                             |                                      |                                      |                                                 |                                                        |                                                        |
| R <sub>work</sub> (%) <sup>c</sup>            | 16.39                                | 18.20                                | 21.5                                            | 20.84                                                  | 21.85                                                  |
| R <sub>free</sub> (%) <sup>d</sup>            | 20.81                                | 24.64                                | 25.9                                            | 26.2                                                   | 27.55                                                  |
| r.m.s.d. <sup>e</sup><br>from ideality        |                                      |                                      |                                                 |                                                        |                                                        |
| Bonds (Å)                                     | 0.007                                | 0.008                                | 0.004                                           | 0.003                                                  | 0.004                                                  |
| Angles (°)                                    | 0.91                                 | 0.93                                 | 0.64                                            | 0.60                                                   | 0.68                                                   |
| Twin law                                      | -h,l,k                               | -h,l,k                               |                                                 |                                                        |                                                        |
| Twin fraction                                 | 0.49                                 | 0.49                                 |                                                 |                                                        |                                                        |
| Wilson<br>B-factor (Å <sup>2</sup> )          | 18.5                                 | 20.7                                 | 27.4                                            | 28.0                                                   | 33.3                                                   |
| Ramachandran <sup>f</sup>                     |                                      |                                      |                                                 |                                                        |                                                        |
| Favored (%)                                   | 96.88                                | 96.09                                | 99.24                                           | 98.5                                                   | 100                                                    |
| Allowed (%)                                   | 3.12                                 | 3.90                                 | 0.76                                            | 1.5                                                    | 0                                                      |
| Outliers (%)                                  | 0                                    | 0                                    | 0                                               | 0                                                      | 0                                                      |
| <b>PDB ID</b>                                 | 4WSZ                                 | 4WTO                                 | 4WUH                                            | 4WU4                                                   | 4WUL                                                   |

11 <sup>a</sup> Values for the last shell are in parenthesis

12 <sup>b</sup>  $R_{\text{merge}} = \sum |I - \langle I \rangle| / \sum I$ , where I is measured intensity for reflections with indices of hkl

13 <sup>c</sup>  $R_{\text{work}} = \sum |F_o - F_c| / \sum |F_o|$  for all data with  $F_o > 2 \sigma(F_o)$  excluding data to calculate  $R_{\text{free}}$

14 <sup>d</sup>  $R_{\text{free}} = \sum |F_o - F_c| / \sum |F_o|$  for all data with  $F_o > 2 \sigma(F_o)$  excluded from refinement.

15 <sup>e</sup> Root mean square deviation

16 <sup>f</sup> Calculated by using MolProbity (1)

17

## 18 Supplemental Experimental Procedures

19

### 20 Expression and purification of *E. faecalis* response regulator S613 LiaR and variants

21 The gene encoding LiaR S613 was cloned between the NcoI/HindIII sites of the modified  
22 pET-Duet vector (Novagen, NJ, USA) containing an N-terminal His tagged SUMO peptide  
23 sequence and expressed in *Escherichia coli* BL21 (DE3) cells. DNA sequence information  
24 for the adaptive mutant LiaR<sup>D191N</sup> was obtained from *E. faecalis* Turbidostat-derived DAP  
25 resistant (TDR4) strain (MIC=0.5 µg/ml) (Miller et al, 2013). Constructs encoding LiaR  
26 and variants were confirmed by Sanger sequencing (SeqWright). Biophysical and  
27 structural analysis of *E. faecalis* LiaR and its mutants (full length and DNA binding  
28 domain) including the adaptive variant LiaR<sup>D191N</sup> have been hindered by low expression  
29 and poor solubility. Expression of LiaR and LiaR variants in LB with varying temperatures  
30 proved unsatisfactory results. Using EnPresso B (Biosilta, Oulu, Finland) provided  
31 significant improvement in yield of soluble and folded protein. Overproduction of soluble  
32 LiaR<sup>WT</sup>, LiaR<sup>D50E</sup> and LiaR<sup>D50A</sup> routinely produced about 1 mg/per 100 ml of cell culture  
33 for the full length of protein and about 2 mg/per 100 ml of cell culture for the DNA binding  
34 domain of LiaR. Adaptive mutant LiaR<sup>D191N</sup> could only be isolated at the scale of ~300  
35 µg/per 100 ml of induced cell culture due to a smaller amount of total expressed protein.  
36 Yield of the LiaR<sup>D50E/D191N</sup> was extremely low (about 50 µg/per 100 ml of induced cell  
37 culture). Gel filtration chromatography (Superdex-200) suggested significant aggregation  
38 of LiaR<sup>D50E/D191N</sup> even at moderate ionic strength (300 mM NaCl) and glycerol (20% v/v)  
39 where other LiaR variants were well behaved.

40 For purification, the frozen cell pellet was re-suspended in Buffer A (50 mM Tris  
41 pH 7.4, 0.5 M NaCl, 20 mM Imidazole, 0.3 mM DDT, 0.2 mM PMSF, 20% (v/v) glycerol,  
42 0.05 % (v/v) Tween-20) and Complete protease inhibitor cocktail tablet, EDTA-free  
43 (Roche Diagnostics Corp, Indianapolis, IN, US). Lysis was performed using Branson  
44 Sonifier 250 (VWR Scientific). The lysate was then centrifuged for 60 min at 24,000 rpm  
45 at 4°C. The supernatant was loaded onto a Hi Trap affinity (Ni<sup>2+</sup>) column (GE Healthcare  
46 Life Sciences). The column was washed with 10 column volumes of Buffer A, and eluted  
47 with a step elution gradient from 20 to 500 mM Imidazole (pH 7.5). The fractions  
48 containing the protein of interest were pooled, dialyzed against 50 mM Tris pH 7.5, 0.5 M  
49 NaCl, 0.3 mM DTT, 20 % (v/v) glycerol, 0.05 % (v/v) Tween-20 overnight at 4 °C. N-  
50 terminal SUMO peptide (within the 6xHis tag) was removed by treatment with His-tagged  
51 SUMO protease. LiaR without the 6xHis SUMO- tag was purified from the reaction  
52 mixture using the same chromatography strategy described above. The fractions containing  
53 LiaR were pooled, dialyzed against 50 mM Tris pH 7.5, 0.5 M NaCl, 0.3 mM DTT, 5mM  
54 MgCl<sub>2</sub>, 20 % (v/v) glycerol, 0.05 % (v/v) Tween-20 and purified over a Q-XL Sepharose  
55 column (GE Healthcare) using a 0.1-1 M NaCl gradient. The peak fractions were pooled,  
56 concentrated and loaded onto a Superdex-200 column (GE Healthcare, HiLoad 16/60) (50  
57 mM Tris pH 7.5, 0.3 M NaCl, 0.3 mM DTT, 10 mM MgCl<sub>2</sub>, 20 % (v/v) glycerol, 0.05 %  
58 (v/v) Tween-20) for the final purification step. The purities of the expressed proteins  
59 LiaR<sup>WT</sup>, LiaR<sup>D50E</sup>, LiaR<sup>D50A</sup>, LiaR<sup>D191N</sup>, double mutant LiaR<sup>D50E/D191N</sup>, LiaR<sup>DBD</sup> and  
60 LiaR<sup>(DBD)D191N</sup> proteins were assessed by SDS-PAGE to be greater than 95%.

### 61 Analytical Ultracentrifugation

62

63 All samples were prepared in 50 mM Tris-HCl, 300 mM NaCl, 10 mM MgCl<sub>2</sub>, 0.3 mM  
64 DTT, 20% (v/v) glycerol and 0.05% (v/v) Tween-20 at pH 7.5 and loaded into sample  
65 chambers with Epon double sector centerpieces and sapphire windows. SEQ scans were  
66 recorded using either the absorbance at 280 nm (LiaR, LiaR<sup>D50E</sup> and LiaR<sup>D191N</sup>) or  
67 interference optics (LiaR<sup>DBD</sup>, LiaR<sup>(DBD)D191N</sup>), after 72 h incubation at each rotor speed.  
68 The protein partial specific volume and solvent density were calculated using Sednterp  
69 1.09 (2) Rotor speeds for LiaR<sup>WT</sup> = 14,000 r.p.m. (abs data), LiaR<sup>D50E</sup> = 14,000 r.p.m. (abs  
70 data), LiaR<sup>D191N</sup> = 11,000, 14000 r.p.m., 19,000 (abs data), DBD LiaR = 22000 r.p.m.,  
71 36,000 r.p.m., 42,000 r.p.m. (interference data), DBD LiaR<sup>D191N</sup> = 36,000 r.p.m. and  
72 42,000 r.p.m. (interference data). A F-statistics error mapping approach was used to  
73 determine the 95% confidence intervals for the dissociation constant. (14,000 r.p.m. for  
74 LiaR<sup>WT</sup>, LiaR<sup>D50E</sup> and LiaR<sup>D191N</sup> and 36,000 r.p.m. for LiaR<sup>DBD</sup> and LiaR<sup>(DBD)D191N</sup>).

75

### 76 DNA footprint analysis by automated capillary electrophoresis (DFACE)

77

78 The 397-bp fluorescent labeled DNA probe for the S613 *E. faecalis* *liaFSR* operon and  
79 350-bp fluorescent labeled DNA probe for the S613 *E. faecalis* *liaXYZ* operon were  
80 generated with PCR amplification with the primers 5'-(VIC)-  
81 CATCGGTAAAACAGTTACTTTCCA -3' and 5'-(FAM)-  
82 GACGATAAAAAAGCGCCAAGGGTT-3' for *liaFSR* operon and 5'-(VIC)-  
83 CAATACTTGGAAAGAATTGGCGAC -3' and 5'-(FAM)-TAATTCTAATACGCG  
84 TTCTCTTTC-3' *liaXYZ* operon from Applied Biosystems (Grand Island, NY). Full length  
85 of LiaR<sup>D191N</sup> protein at 0.5 μM and 5.0 μM was then incubated with respective fluorescent  
86 labeled DNA probe in Binding Buffer (50 mM Tris pH 7.5, 300 mM NaCl, 10 mM MgCl<sub>2</sub>,  
87 and 0.3 mM DTT, 20% (v/v) glycerol, 0.05% (v/v) Tween-20) for 10 min. After this  
88 incubation, DNase I (New England Biolabs Inc., Ipswich, MA, 2 U/μl) digestion was  
89 performed with diluted DNase I (1/10) for 1 min at room temperature (final volume, 20  
90 μl). The reaction was then stopped by adding EDTA to a final concentration of 5 mM  
91 following by incubation at 75°C for 10 min. Control digestions with the probe were  
92 performed in the absence of the protein. The DNA fragments were purified with a QIA-  
93 quick PCR purification kit (Qiagen, Valencia, CA) and then sent to the Plant-Microbe  
94 Genomics Facility for further analysis. Fragments from 2 μl of each sample were separated  
95 and detected on a 3730 DNA analyzer (Applied Biosystems; AB) with a 50 cm capillary.  
96 Each sample was combined with 9 μl HiDi/0.1μl GS600LIZ size standard (AB) and  
97 injected with 3kV for 30s to maximize signal. The resulting electropherograms from the  
98 DFACE assay were analyzed with the software GeneMapper 4.0 set to normalize all  
99 samples to the sum of the signal of all samples. In addition, the histograms were further  
100 normalized by subtracting the height of the equivalent peak (same Bin) in the negative  
101 control from the sample, i.e. each bar is the difference between sample and negative  
102 control. Data reported utilized fragments/strand labeled with VIC dye.

103

### 104 Determination of LiaR and LiaR variants DNA binding activity by Microscale 105 Thermophoresis

106 The 5'-ends of the specified oligonucleotides labeled with fluorescein (Flc) were purchased  
107 from Sigma-Aldrich. The annealing of the two complementary strands was performed in  
108 50 mM Tris-HCl (pH 7.5), 300 mM NaCl, and 10 mM MgCl<sub>2</sub> by heating at 95°C for 10

109 min and slowly cooling to the room temperature. A solution of unlabeled LiaR (wild type  
110 or mutants) was serially diluted in reaction buffer (50 mM Tris pH 7.5, 300 mM NaCl, 10  
111 mM MgCl<sub>2</sub>, 0.3 mM DTT, 20% (v/v) glycerol, 0.05% (v/v) Tween-20) to which an equal  
112 volume of fluorescein labeled DNA was added to a final concentration of 40 nM. The  
113 samples were loaded into standard treated capillaries (NanoTemper).

114 MST Data Fitting: The raw MST traces for each individual experiment were transformed  
115 and fit according to published methods (3). Briefly, each raw fluorescence trace is fit to the  
116 law of mass action equation  $F=(1/2c_A)(c_T+c_A+K_d-\sqrt{(c_T+c_A+K_d)^2-(4*c_T*c_A)})$ , where  
117  $K_d$  is the dissociation constant,  $c_A$  is the concentration of the fluorescently labeled molecule  
118 (titrant), and  $c_T$  is the concentration of titrant. Note, when the markers were increased in  
119 size for readability the error bars became covered in some cases. Attempts to fit the data  
120 with a cooperativity parameter were not satisfactory suggesting that at these protein  
121 concentrations the tetrameric oligomeric state was already predominant. This was in good  
122 agreement with our AUC data.

123

#### 124 **Crystallization, data collection and structure determination of the LiaR<sup>DBD</sup>,** 125 **LiaR<sup>(DBD)D191N</sup>.**

126

127 Crystals were briefly soaked in mother liquor plus 20% (v/v) glycerol and were flash frozen  
128 in a liquid-nitrogen stream. X-ray diffraction data were processed using HKL2000 (4). The  
129 crystal belonged to the space group P2<sub>2</sub>1<sub>2</sub>1 with the unit cell parameters a=31.23, b=77.02,  
130 c=77.19,  $\alpha=\beta=\gamma=90^\circ$ . Crystals of DNA binding LiaR<sup>D191N</sup> suitable for data collection were  
131 obtained in 0.1 M Tris pH 8.5, 0.2 M LiSO<sub>4</sub>, 25% PEG 3,350 (w/v), 0.05% (v/v) Tween-  
132 20, 20% (v/v) glycerol, 10 mM Praseodymium (III) acetate hydrate using native  
133 microcrystal seeds of DNA binding LiaR. Prior to data collection, crystals were briefly  
134 transferred to 25% (v/v) glycerol plus mother liquor and flash cooled in liquid nitrogen.  
135 The diffraction data set was collected to 1.5 Å resolution at Argonne National Laboratory's  
136 Advanced Photon Source beamline 21-ID-G on a MarMosaic 300 CCD detector. The  
137 crystal belonged to the space group P2<sub>2</sub>1<sub>2</sub>1 with the unit cell parameters a=31.05, b=76.92,  
138 c=76.92,  $\alpha=\beta=\gamma=90^\circ$ .

139

#### 140 **Crystallization, data collection and structure determination of the LiaR<sup>DBD</sup> and** 141 **LiaR<sup>(DBD)D191N</sup>/DNA complexes.**

142

143 The DNA used in the present structures are double-stranded DNA 26-bp in length with  
144 blunt ends (*liaXYZ*\_ updated from DFACE experiment: 5'-  
145 CTAGTCCTTACTAATGAGAAGAAAT) and 23-mer oligonucleotide duplex of 22-bp  
146 with one G nucleotide overhang on 5'-end (*liaXYZ*\_ predicted consensus sequence: 5'-  
147 GAAATCGTTCCTAAGTCCTATGA). The DBD LiaR and LiaR<sup>D191N</sup>-DNA complex  
148 was prepared by mixing 0.5 mM of protein with 0.5 mM DNA duplex. Crystals of the DBD  
149 LiaR-22bp DNA complex were grown in 0.2 M Magnesium formate dihydrate, 20% w/v  
150 PEG 3.350, 0.012 M Spermine tetrachloride. Before data collection the crystals were  
151 gradually transferred to a cryo-protectant solution containing 20% (v/v) glycerol (v/v) and  
152 flash-frozen in liquid nitrogen. Diffraction data were processed and scaled with the  
153 HKL2000. These crystals belong to space group P6<sub>2</sub> with the unit cell parameters  
154 a=113.58, b=113.58, c=48.22,  $\alpha=\beta=120^\circ$ ,  $\gamma=90^\circ$  and P2<sub>1</sub>2<sub>1</sub>2<sub>1</sub> with the unit cell parameters  
155 a=38.34, b=77.25, c=104.98,  $\alpha=\beta=\gamma=90^\circ$ . The molecular replacement method was used to

156 determine the structures of DNA–protein complexes using isolated DBD structures of S613  
157 *E. faecalis* LiaR<sup>D191N</sup> solved previously (see above) in Phaser-MR (5), which successfully  
158 placed two molecules of the respective domain in the asymmetric unit. After several cycles  
159 of rigid-body refinement and restrained refinement using phenix.refine (6), a 2mFo-DFc  
160 map revealed electron density of the ds-DNA. The double-stranded DNA was built  
161 manually using the 2mFo-Fc and mFo-DFc electron density map as guide in COOT (7).  
162 Each round of refinement was followed by manual rebuilding and placement of additional  
163 nucleotides as the electron density map improved. Structure refinement was carried out  
164 iteratively using PHENIX and included simulated annealing, group B factor refinement,  
165 model building and density modification. Water molecules were added using the update  
166 water option in phenix.refine and by manual inspection of 2Fo-Fc electron density maps.  
167 In the LiaR<sup>D191N</sup>/22-bp DNA complex structure only 17-bp could be modeled. All  
168 structures were validated using a structure validation program MolProbity (1).

### 169 **CURVES+ analysis.**

170

171 The scripts used were:

172

```
173 /home/kakhanip/curves+/Cur+ <<!
```

```
174 &inp
```

```
175 file=138_renumbered_correct_order,lis=curves_138_renumbered_correct_order,lib=/ho
```

```
176 me/kakhanip/curves+/standard,
```

```
177 &end
```

```
178 2 1 -1 0 0
```

```
179 1:17
```

```
180 18:34
```

```
181 !
```

```
182 /home/kakhanip/curves+/Cur+ <<!
```

```
183 &inp file=127,lis=curves_127,lib=/home/kakhanip/curves+/standard,
```

```
184 &end
```

```
185 2 1 -1 0 0
```

```
186 1:26
```

```
187 52:27
```

```
188 !
```

189 Overall bending is measured between the ends of the helical axis. To address concerns that  
190 the DNA ends might be more distorted and exaggerating the predicted bend we deleted  
191 bases (-86), (-100), (-101), (-102) in case of consensus sequence, and region -99-(-101) in  
192 case of secondary site, since those bases had stronger evidence for crystal packing effects.  
193 Either way however the overall bend did not change dramatically suggesting that the  
194 protein on the DNA induces the DNA bending bound to the LiaR surface and is not a  
195 crystal packing artifact.

196

197 The scripts used were:

198

```
199 /home/kakhanip/curves+/Cur+ <<!
```

```

200 &inp
201 file=138,lis=curves_138_smaller_boundary_1_start_3_end,lib=/home/kakhanip/curves+/
202 standard,
203 &end
204 2 1 -1 0 0
205 2:14
206 19:31
207 !
208 /home/kakhanip/curves+/Cur+ <<!
209 &inp
210 file=127,lis=curves_127_smallerboundary_3_from_end,lib=/home/kakhanip/curves+/sta
211 ndard,
212 &end
213 2 1 -1 0 0
214 1:23
215 52:30
216 !

```

## 218 FIGURES LEGENDS.

### 219 S1.

220 **A schematic view of the secondary structure of the LiaR<sup>(DBD)</sup> with the residues shown**  
 221 **for each helix.** The figure was created using a custom generated pictorial web-based  
 222 database (PDBsum) (8).

### 224 S2.

225 **Closed up view of the binding interface of the LiaR<sup>(DBD)D191N</sup> bound to DNA sequences**  
 226 **derived from the *liaXYZ* consensus and secondary sites.**

227 The FEMs (Feature Enhanced Maps) are modified  $2mF_{\text{obs}} - DF_{\text{model}}$   $\sigma_A$ -weighted maps  
 228 computed using phenix to reduce the model bias and retain the existing features (6). The  
 229 (FEM–PHIFEM) electron density map is contoured at 0.6 absolute value of electrons/Å<sup>3</sup>  
 230 to show how Lys174, Lys177 and Thr178 interact with DNA. The consensus sequence  
 231 bases are indicated as red color.

## 233 Supplementary References

### 235 References

- 237 1. Chen, V.B., Arendall, W.B., 3rd, Headd, J.J., Keedy, D.A., Immormino, R.M., Kapral, G.J.,  
 238 Murray, L.W., Richardson, J.S. and Richardson, D.C. (2010) MolProbity: all-atom  
 239 structure validation for macromolecular crystallography. *Acta Crystallogr D Biol*  
 240 *Crystallogr*, **66**, 12-21.
- 241 2. Laue, T.M., Shah, B.D., Ridgeway, T.M. and Pelletier, S.L. (1992) *Computer-aided*  
 242 *interpretation of analytical sedimentation data for proteins. Analytical*  
 243 *Ultracentrifugation in Biochemistry and Polymer Science*. Royal Society of Chemistry,  
 244 Cambridge.
- 245 3. Seidel, S.A., Dijkman, P.M., Lea, W.A., van den Bogaart, G., Jerabek-Willemsen, M., Lazic,  
 246 A., Joseph, J.S., Srinivasan, P., Baaske, P., Simeonov, A. *et al.* (2013) Microscale

- 247 thermophoresis quantifies biomolecular interactions under previously challenging  
 248 conditions. *Methods*, **59**, 301-315.
- 249 4. Otwinowski, Z. and Minor, W. (1997) In Charles W. Carter, Jr. (ed.), *Methods in*  
 250 *Enzymology*. Academic Press, Vol. Volume 276, pp. 307-326.
- 251 5. McCoy, A.J., Grosse-Kunstleve, R.W., Adams, P.D., Winn, M.D., Storoni, L.C. and Read,  
 252 R.J. (2007) Phaser crystallographic software. *Journal of applied crystallography*, **40**,  
 253 658-674.
- 254 6. Adams, P.D., Afonine, P.V., Bunkoczi, G., Chen, V.B., Davis, I.W., Echols, N., Headd, J.J.,  
 255 Hung, L.W., Kapral, G.J., Grosse-Kunstleve, R.W. *et al.* (2010) PHENIX: a  
 256 comprehensive Python-based system for macromolecular structure solution. *Acta*  
 257 *crystallographica. Section D, Biological crystallography*, **66**, 213-221.
- 258 7. Emsley, P. and Cowtan, K. (2004) Coot: model-building tools for molecular graphics.  
 259 *Acta crystallographica. Section D, Biological crystallography*, **60**, 2126-2132.
- 260 8. Laskowski, R.A. (2001) PDBsum: summaries and analyses of PDB structures. *Nucleic*  
 261 *Acids Res*, **29**, 221-222.

262  
 263  
 264

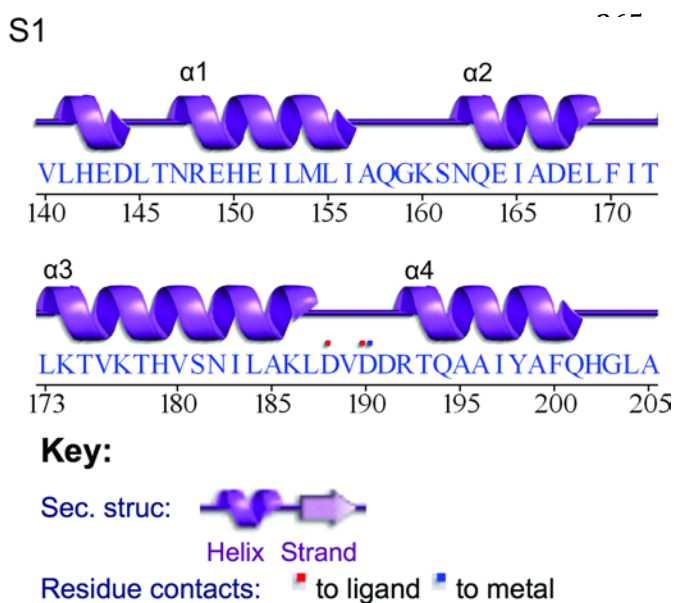

S2

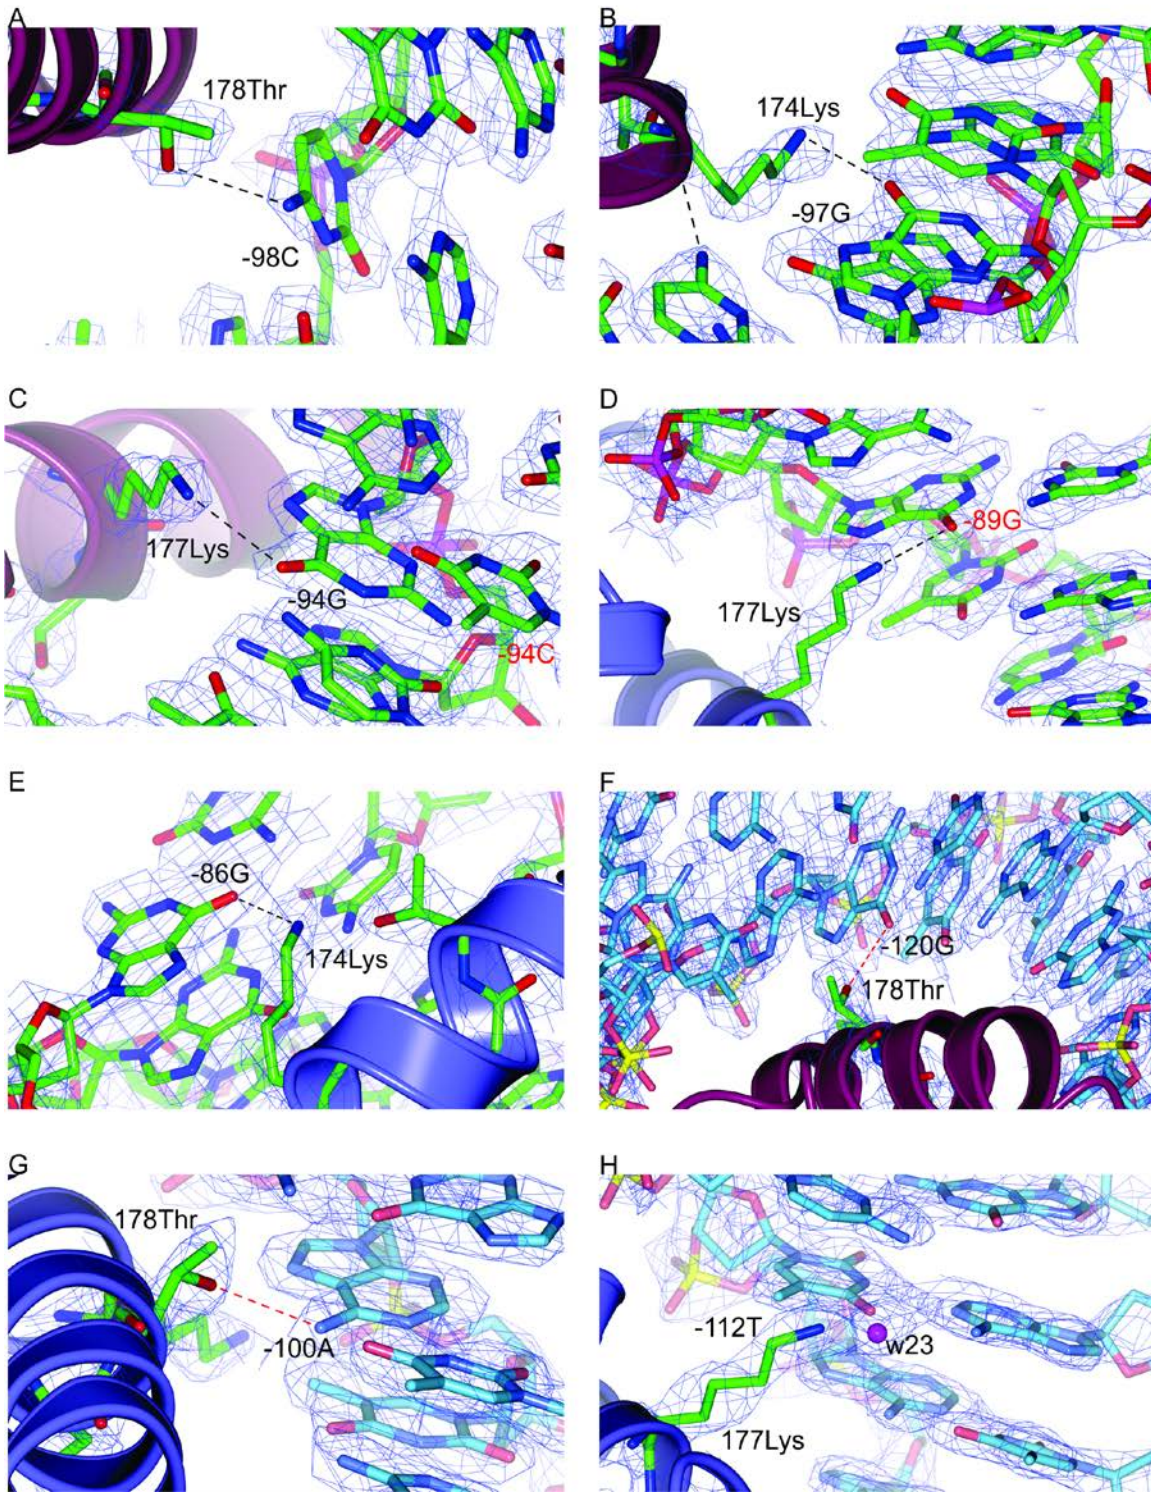

Supplement: supp_gkv321_nar-03435-f-2014-File011.pdf [file supp_gkv321_nar-03435-f-2014-File011.pdf]
